# Supplementary material for: Tunable type-II lateral MoSi2N4/WSi2N4 heterostructures for photocatalytic applications
Source: Royal Society of Chemistry journal article supplement (doi:10.1039/d2cp03406a), 2022-01-01
Supplement: d2cp03406a1.pdf [file d2cp03406a1.pdf]

## Supplementary Information

### Tunable type-II lateral $\text{MoSi}_2\text{N}_4/\text{WSi}_2\text{N}_4$ heterostructures for photocatalytic applications

Wanxin Zhou<sup>1#</sup>, Xingchen Zhou<sup>1#</sup>, Cuihong Yang<sup>1</sup>, Jingyun Zhang<sup>1</sup>, Lu Wang<sup>1</sup>, Qingfang Li<sup>1,2,3\*</sup>

<sup>1</sup>School of Physics & Optoelectronic Engineering, Nanjing University of Information Science and Technology, Nanjing 210044, People's Republic of China

<sup>2</sup>Jiangsu Key Laboratory for Optoelectronic Detection of Atmosphere and Ocean, Nanjing University of Information Science & Technology, Nanjing 210044, China

<sup>3</sup>Jiangsu International Joint Laboratory on Meteorological Photonics and Optoelectronic Detection, Nanjing University of Information Science & Technology, Nanjing 210044, China

# The first two authors contributed equally to this investigation

**Table I.** The detailed information about crystal structure in  $(\text{MoSi}_2\text{N}_4)_m(\text{WSi}_2\text{N}_4)_n$  lateral HSs with different widths. The  $w$ ,  $a$ ,  $h$  and  $S$  are the width, lattice constant, thickness and contact area of lateral HSs, respectively.

| $m(n)$ | $w$ (Å) | $a$ (Å) | $h$ (Å) | $S$ (Å <sup>2</sup> ) |
|--------|---------|---------|---------|-----------------------|
| 4(4)   | 10.563  | 5.029   | 7.060   | 35.504                |
| 5(5)   | 13.479  | 5.033   | 7.068   | 35.575                |
| 6(6)   | 16.396  | 5.035   | 7.071   | 35.603                |
| 7(7)   | 19.304  | 5.036   | 7.073   | 35.622                |
| 8(8)   | 22.216  | 5.038   | 7.073   | 35.630                |

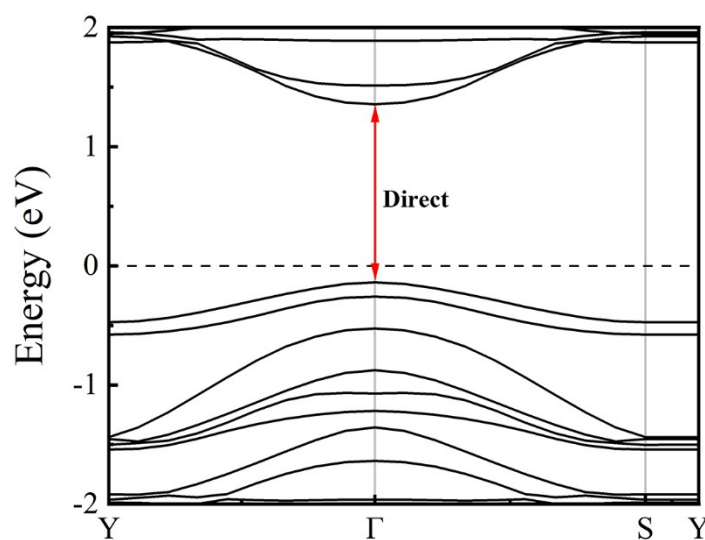

**Fig. S1.** Band structure of  $(\text{MoSi}_2\text{N}_4)_4(\text{WSi}_2\text{N}_4)_4$  lateral heterostructure based on HSE

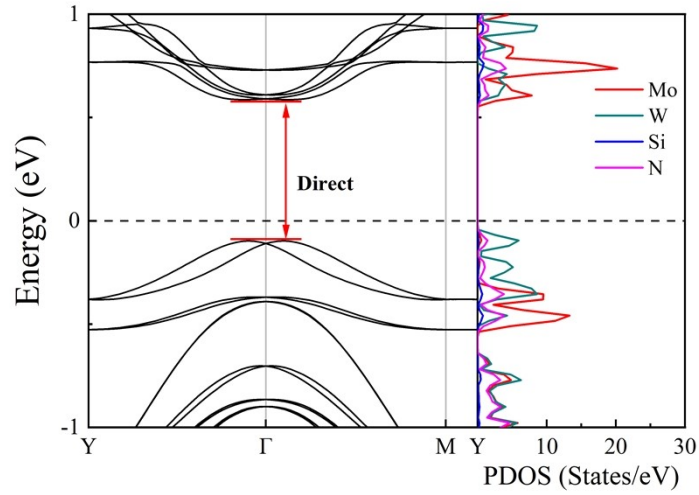

**Fig. S2.** Band structure and PDOS of  $(\text{MoSi}_2\text{N}_4)_5(\text{WSi}_2\text{N}_4)_5$  based on PBE+SOC.

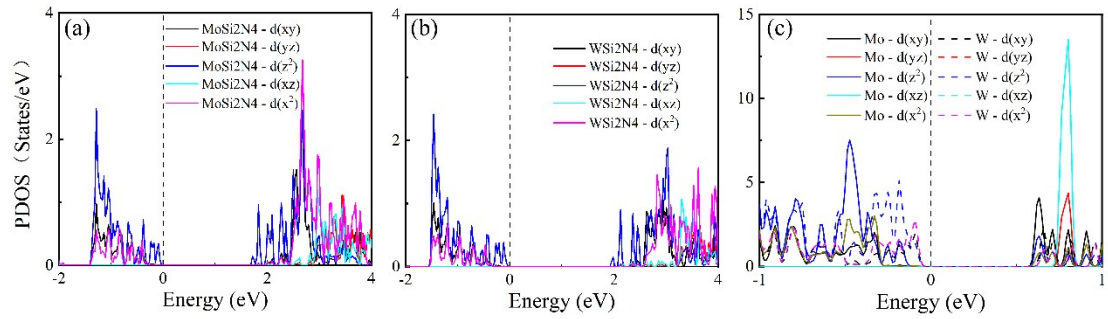

**Fig. S3.** The density of states of d orbitals of Mo/W in the (a)  $\text{MoSi}_2\text{N}_4$ , (b)  $\text{MoSi}_2\text{N}_4$  and (c)  $(\text{MoSi}_2\text{N}_4)_8(\text{WSi}_2\text{N}_4)_8$  lateral HSs.

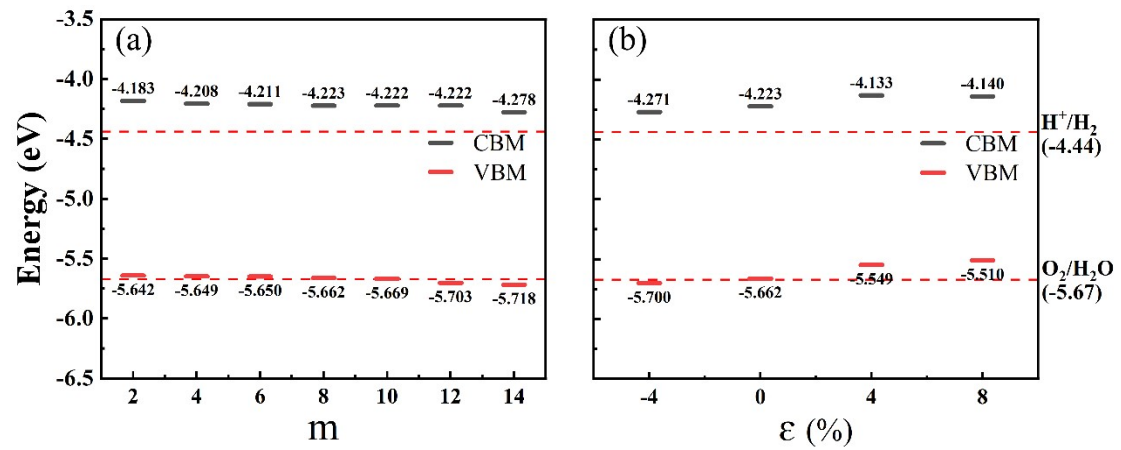

**Fig. S4.** The band alignments of (a)  $(\text{MoSi}_2\text{N}_4)_m(\text{WSi}_2\text{N}_4)_n$  ( $m+n=16$ ) with the different component ratios, (b)  $(\text{MoSi}_2\text{N}_4)_8(\text{WSi}_2\text{N}_4)_8$  lateral HSs with the different strains.
